# Supplementary material
Source: PubMed Central journal article supplement (PMC7989138)
Supplement: DS_10.1177_0022034520973012.pdf [file DS_10.1177_0022034520973012.pdf]

## Appendix – References for Table.

1. Lee, J.S., et al., *Host surface ectonucleotidase-CD73 and the opportunistic pathogen, Porphyromonas gingivalis, cross-modulation underlies a new homeostatic mechanism for chronic bacterial survival in human epithelial cells*. *Virulence*, 2020. **11**(1): p. 414-429.
2. Kao, D.J., et al., *Intestinal Epithelial Ecto-5'-Nucleotidase (CD73) Regulates Intestinal Colonization and Infection by Nontyphoidal Salmonella*. *Infect Immun*, 2017. **85**(10).
3. Spooner, R., et al., *Danger signal adenosine via adenosine 2a receptor stimulates growth of Porphyromonas gingivalis in primary gingival epithelial cells*. *Molecular oral microbiology*, 2014. **29**(2): p. 67-78.
4. Foschetti, D.A., et al., *Clostridium difficile toxins or infection induce upregulation of adenosine receptors and IL-6 with early pro-inflammatory and late anti-inflammatory pattern*. *Braz J Med Biol Res*, 2020. **53**(9): p. e9877.
5. Bhalla, M., et al., *A1 adenosine receptor signaling reduces Streptococcus pneumoniae adherence to pulmonary epithelial cells by targeting expression of platelet-activating factor receptor*. *Cell Microbiol*, 2020. **22**(2): p. e13141.
6. Atanasova, K., et al., *Nucleoside-Diphosphate-Kinase of P. gingivalis is Secreted from Epithelial Cells In the Absence of a Leader Sequence Through a Pannexin-1 Interactome*. *Scientific reports*, 2016. **6**: p. 37643.
7. Bui, F.Q., et al., *Fusobacterium nucleatum infection of gingival epithelial cells leads to NLRP3 inflammasome-dependent secretion of IL-1beta and the danger signals ASC and HMGB1*. *Cell Microbiol*, 2016. **18**(7): p. 970-81.
8. Yilmaz, O. and K.L. Lee, *The inflammasome and danger molecule signaling: at the crossroads of inflammation and pathogen persistence in the oral cavity*. *Periodontol 2000*, 2015. **69**(1): p. 83-95.
9. Roberts, J.S., et al., *Opportunistic Pathogen Porphyromonas gingivalis Modulates Danger Signal ATP-Mediated Antibacterial NOX2 Pathways in Primary Epithelial Cells*. *Frontiers in Cellular and Infection Microbiology*, 2017. **7**: p. 291.
10. Jun, H.K., Y.J. Jung, and B.K. Choi, *Treponema denticola, Porphyromonas gingivalis, and Tannerella forsythia induce cell death and release of endogenous danger signals*. *Arch Oral Biol*, 2017. **73**: p. 72-78.
11. Ding, Q., S.Y. Quah, and K.S. Tan, *Secreted adenosine triphosphate from Aggregatibacter actinomycetemcomitans triggers chemokine response*. *Mol Oral Microbiol*, 2016. **31**(5): p. 423-34.
12. Vicencio, E., et al., *Aggregatibacter Actinomycetemcomitans Induces Autophagy in Human Junctional Epithelium Keratinocytes*. *Cells*, 2020. **9**(5).

13. Lee, K., et al., *Porphyromonas gingivalis* traffics into endoplasmic reticulum-rich-autophagosomes for successful survival in human gingival epithelial cells. *Virulence*, 2018. **9**(1): p. 845-859.
14. Johnson, L., et al., *Porphyromonas gingivalis* attenuates ATP-mediated inflammasome activation and HMGB1 release through expression of a nucleoside-diphosphate kinase. *Microbes Infect*, 2015. **17**(5): p. 369-77.
15. Hiroshima, Y., et al., *Advanced glycation end-products and Porphyromonas gingivalis lipopolysaccharide increase calprotectin expression in human gingival epithelial cells*. *J Cell Biochem*, 2018. **119**(2): p. 1591-1603.
16. Diaz-Ochoa, V.E., et al., *Salmonella Mitigates Oxidative Stress and Thrives in the Inflamed Gut by Evading Calprotectin-Mediated Manganese Sequestration*. *Cell Host Microbe*, 2016. **19**(6): p. 814-25.
17. Ross, K.F. and M.C. Herzberg, *Autonomous immunity in mucosal epithelial cells: fortifying the barrier against infection*. *Microbes Infect*, 2016. **18**(6): p. 387-398.
